# Supplementary material
Source: MDPI journal article supplement (https://www.mdpi.com/2075-163X/8/4/135)
Supplement: s1 [file s1]

## Supplementary Materials: Effect of grinding on chrysotile, amosite and crocidolite and implications for thermal treatment

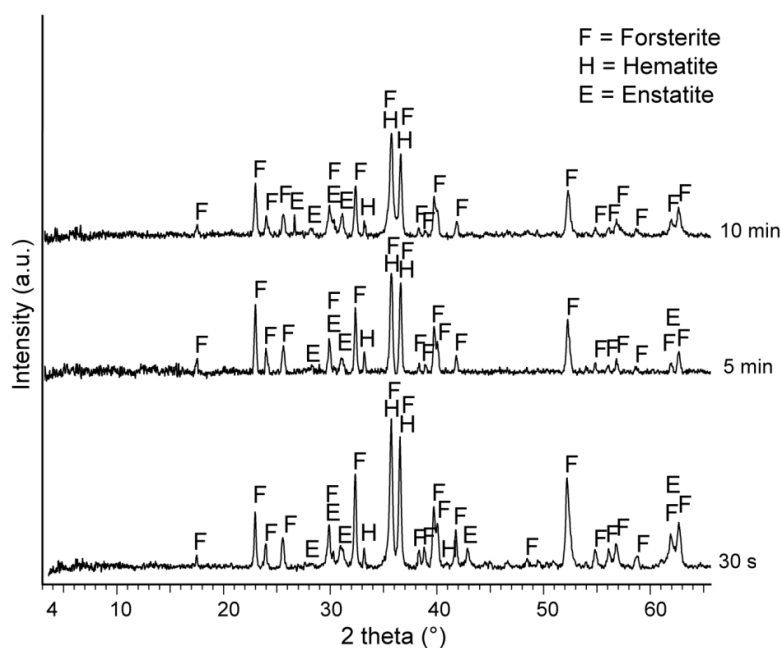

**Figure S1.** XRPD diagrams after the heating at 1000 °C of chrysotile ground for 30 s, 5 min and 10 min. Newly formed phases: F = forsterite, E = enstatite. H = hematite already presents as impurity.

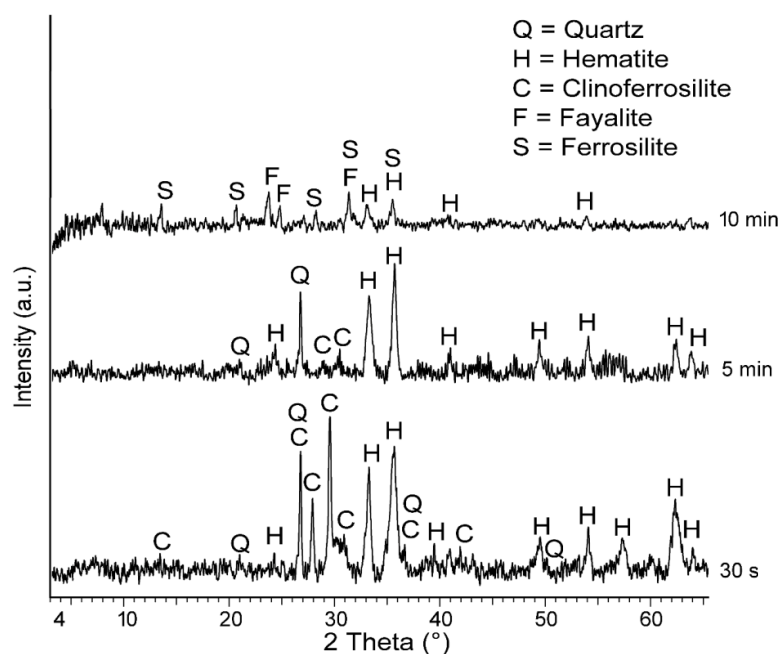

**Figure S2.** XRPD diagrams after the heating at 1000 °C of amosite ground for 30 s, 5 min and 10 min. Newly formed phases: H = hematite, C = clinoferrrosilite, F = fayalite, S = ferrosilite. Q = quartz already presents as impurity.

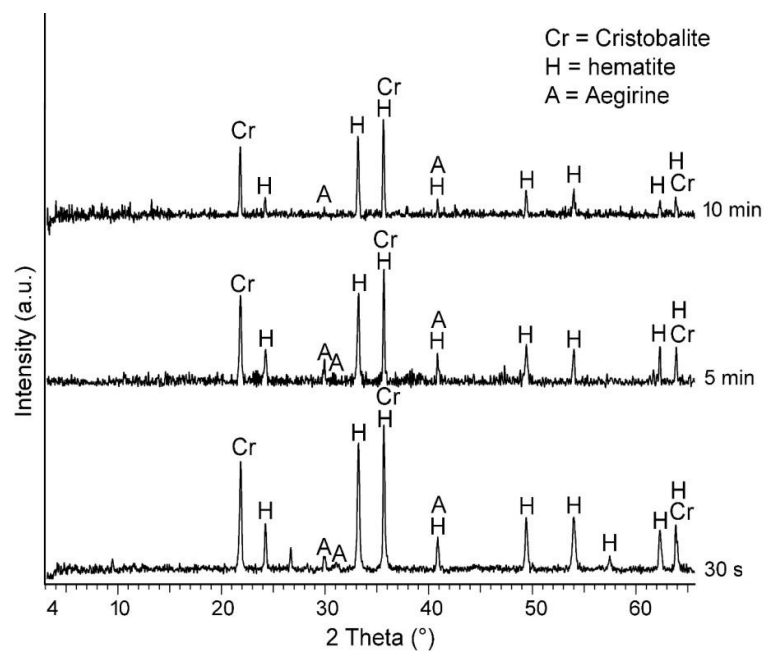

**Figure S3.** XRPD diagrams after the heating at 1000 °C of crocidolite ground for 30 s, 5 min and 10 min. Newly formed phases: Cr = cristobalite, H = hematite, A = aegirine.
